# Supplementary material
Source: PubMed Central journal article supplement (PMC5033869)
Supplement: jciinsight-1-85061-s001.pdf [file jciinsight-1-85061-s001.pdf]

**Supplementary Table 1. Characteristics of patients whose *PPP3CA* mRNA expression levels were analyzed.**

| No | <i>PPP3CA</i> mRNA | D-S staging | Hb (g/dL) | LDH      | therapy, response | response to bortezomib | PFS (days) | censored case |
|----|--------------------|-------------|-----------|----------|-------------------|------------------------|------------|---------------|
| 1  | 1.060              | II          | 10.4      | normal   | VMP, PR           | +                      | 399        | -             |
| 2  | 2.174              | II          | ND        | abnormal | VMP, SD           | -                      | 172        | -             |
| 3  | 1.540              | III         | 10.4      | abnormal | VMP, CR           | +                      | 899        | +             |
| 4  | 0.095              | I           | 13.3      | normal   | VMP, PR           | +                      | 388        | -             |
| 5  | 1.367              | III         | 13.9      | normal   | VMP, CR           | +                      | 381        | +             |
| 6  | 1.795              | III         | 8.6       | NA       | VMP, SD           | -                      | 92         | -             |
| 7  | 1.083              | II          | 11.6      | NA       | NA                | NA                     | NA         | NA            |
| 8  | 0.854              | III         | 11.2      | normal   | VMP, SD           | -                      | 88         | -             |
| 9  | 0.565              | I           | 11.5      | normal   | VMP, PR           | +                      | 444        | -             |
| 10 | 0.336              | III         | 7.3       | abnormal | NA                | NA                     | NA         | NA            |
| 11 | 0.608              | I           | 11.7      | abnormal | VMP, VGPR         | +                      | 548        | -             |
| 12 | 0.533              | I           | 11.1      | normal   | VMP, PR           | +                      | 174        | -             |
| 13 | 0.457              | I           | 12.3      | normal   | VMP, PR           | +                      | 444        | -             |
| 14 | 1.286              | II          | 13.2      | normal   | BD, sCR           | +                      | 295        | +             |
| 15 | 1.454              | ND          | ND        | normal   | BD, PR            | +                      | 264        | -             |
| 16 | 0.857              | ND          | ND        | normal   | BD, VGPR          | +                      | 487        | +             |
| 17 | 1.360              | ND          | ND        | normal   | VCD, CR           | NA                     | NA         | NA            |
| 18 | 4.628              | ND          | ND        | normal   | BD, ND            | NA                     | 48         | -             |
| 19 | 0.954              | II          | 12.6      | normal   | BD, SD            | -                      | 511        | +             |
| 20 | 0.508              | III         | 9.8       | abnormal | BD, PR            | +                      | 487        | +             |
| 21 | 0.875              | II          | 11.7      | normal   | NA                | NA                     | NA         | NA            |
| 22 | 0.464              | II          | 10.2      | normal   | VRD, PR           | NA                     | NA         | NA            |
| 23 | 0.442              | ND          | ND        | normal   | BD, PR            | +                      | NA         | NA            |
| 24 | 1.138              | ND          | ND        | normal   | BD, VGPR          | +                      | 227        | +             |
| 25 | 0.319              | II          | 10.8      | normal   | NA                | NA                     | NA         | NA            |
| 26 | 1.542              | III         | 7.9       | normal   | VCD, VGPR         | NA                     | NA         | NA            |
| 27 | 1.951              | III         | 8.7       | abnormal | BD, death         | -                      | 60         | -             |
| 28 | 1.036              | III         | 9.7       | abnormal | BD, CR            | +                      | 827        | -             |
| 29 | 0.714              | III         | 8.7       | abnormal | BD, VGPR          | +                      | 825        | +             |
| 30 | 1.276              | I           | 8.7       | normal   | NA                | NA                     | NA         | NA            |
| 31 | 0.592              | II          | 11.3      | normal   | BD, VGPR          | +                      | 332        | -             |
| 32 | 0.996              | ND          | ND        | normal   | BD, VGPR          | +                      | 757        | -             |
| 33 | 0.603              | ND          | ND        | normal   | BD, VGPR          | +                      | 294        | +             |
| 34 | 0.502              | I           | 9.4       | normal   | BD, CR            | +                      | 924        | +             |
| 35 | 0.367              | II          | 10.8      | normal   | BD, CR            | +                      | 885        | +             |
| 36 | 0.979              | II          | 9.5       | abnormal | NA                | NA                     | NA         | NA            |
| 37 | 0.772              | I           | 12.8      | NA       | VMP, PR           | +                      | 516        | -             |
| 38 | 0.554              | I           | 11.5      | NA       | NA                | NA                     | NA         | NA            |
| 39 | 0.572              | III         | 11.5      | normal   | NA                | NA                     | NA         | NA            |
| 40 | 1.454              | III         | 13.0      | NA       | VMP, CR           | +                      | 899        | +             |
| 41 | 1.115              | III         | 8.9       | abnormal | VMP, PR           | +                      | 255        | +             |
| 42 | 1.663              | III         | 8.4       | abnormal | BD, ND            | NA                     | 12         | -             |
| 43 | 1.271              | III         | 8.2       | abnormal | NA                | NA                     | NA         | NA            |
| 44 | 0.943              | II          | 9.5       | normal   | VMP, PR           | +                      | NA         | NA            |
| 45 | 0.945              | III         | 12.4      | normal   | VMP, SD           | -                      | 366        | -             |
| 46 | 2.658              | III         | 7.3       | abnormal | MP, PD            | NA                     | NA         | NA            |
| 47 | 1.643              | III         | 9.6       | abnormal | VRD, PR           | NA                     | NA         | NA            |
| 48 | 1.219              | III         | 7.5       | normal   | VMP, SD           | -                      | 60         | +             |
| 49 | 1.777              | II          | 10.9      | abnormal | NA                | NA                     | NA         | NA            |
| 50 | 1.021              | II          | 9.9       | abnormal | VCD, PR           | NA                     | NA         | NA            |

Response to therapy: SD (stable disease), PR (partial response), VGPR (very good partial response), CR (complete response), sCR (stringent CR), death (death during therapy). Bortezomib sensitivity: - (stable disease to VMP or BD, death during BD), + (partial response to VMP or BD or better). PFS: progression-free survival. ND: not determined. NA: not applicable. Censored case corresponds to the dead or missing patient during the observation.

| Gene                                                                                 | p. Value |
|--------------------------------------------------------------------------------------|----------|
| <i>PSMB5: proteasome subunit, <math>\beta</math> type, 5</i>                         | 2.91E-02 |
| <i>PPP3CA: protein phosphatase 3, catalytic subunit, <math>\alpha</math> isozyme</i> | 6.50E-02 |
| <i>CDK5: cyclin-dependent kinase 5</i>                                               | 1.34E-01 |
| <i>CYP1A1: cytochrome P450, family 1, subfamily A, polypeptide 1</i>                 | 8.45E-01 |

**Supplementary Table 2. Statistical analyses of *PPP3CA* and several genes associated with bortezomib resistance in the data set from the millennium trial.** Whether expression of each gene in the data set from the millennium trial (58) was higher in non-responsive (no change and progressive disease) than in responsive (minor response and better) patients was analyzed using GEO2R.

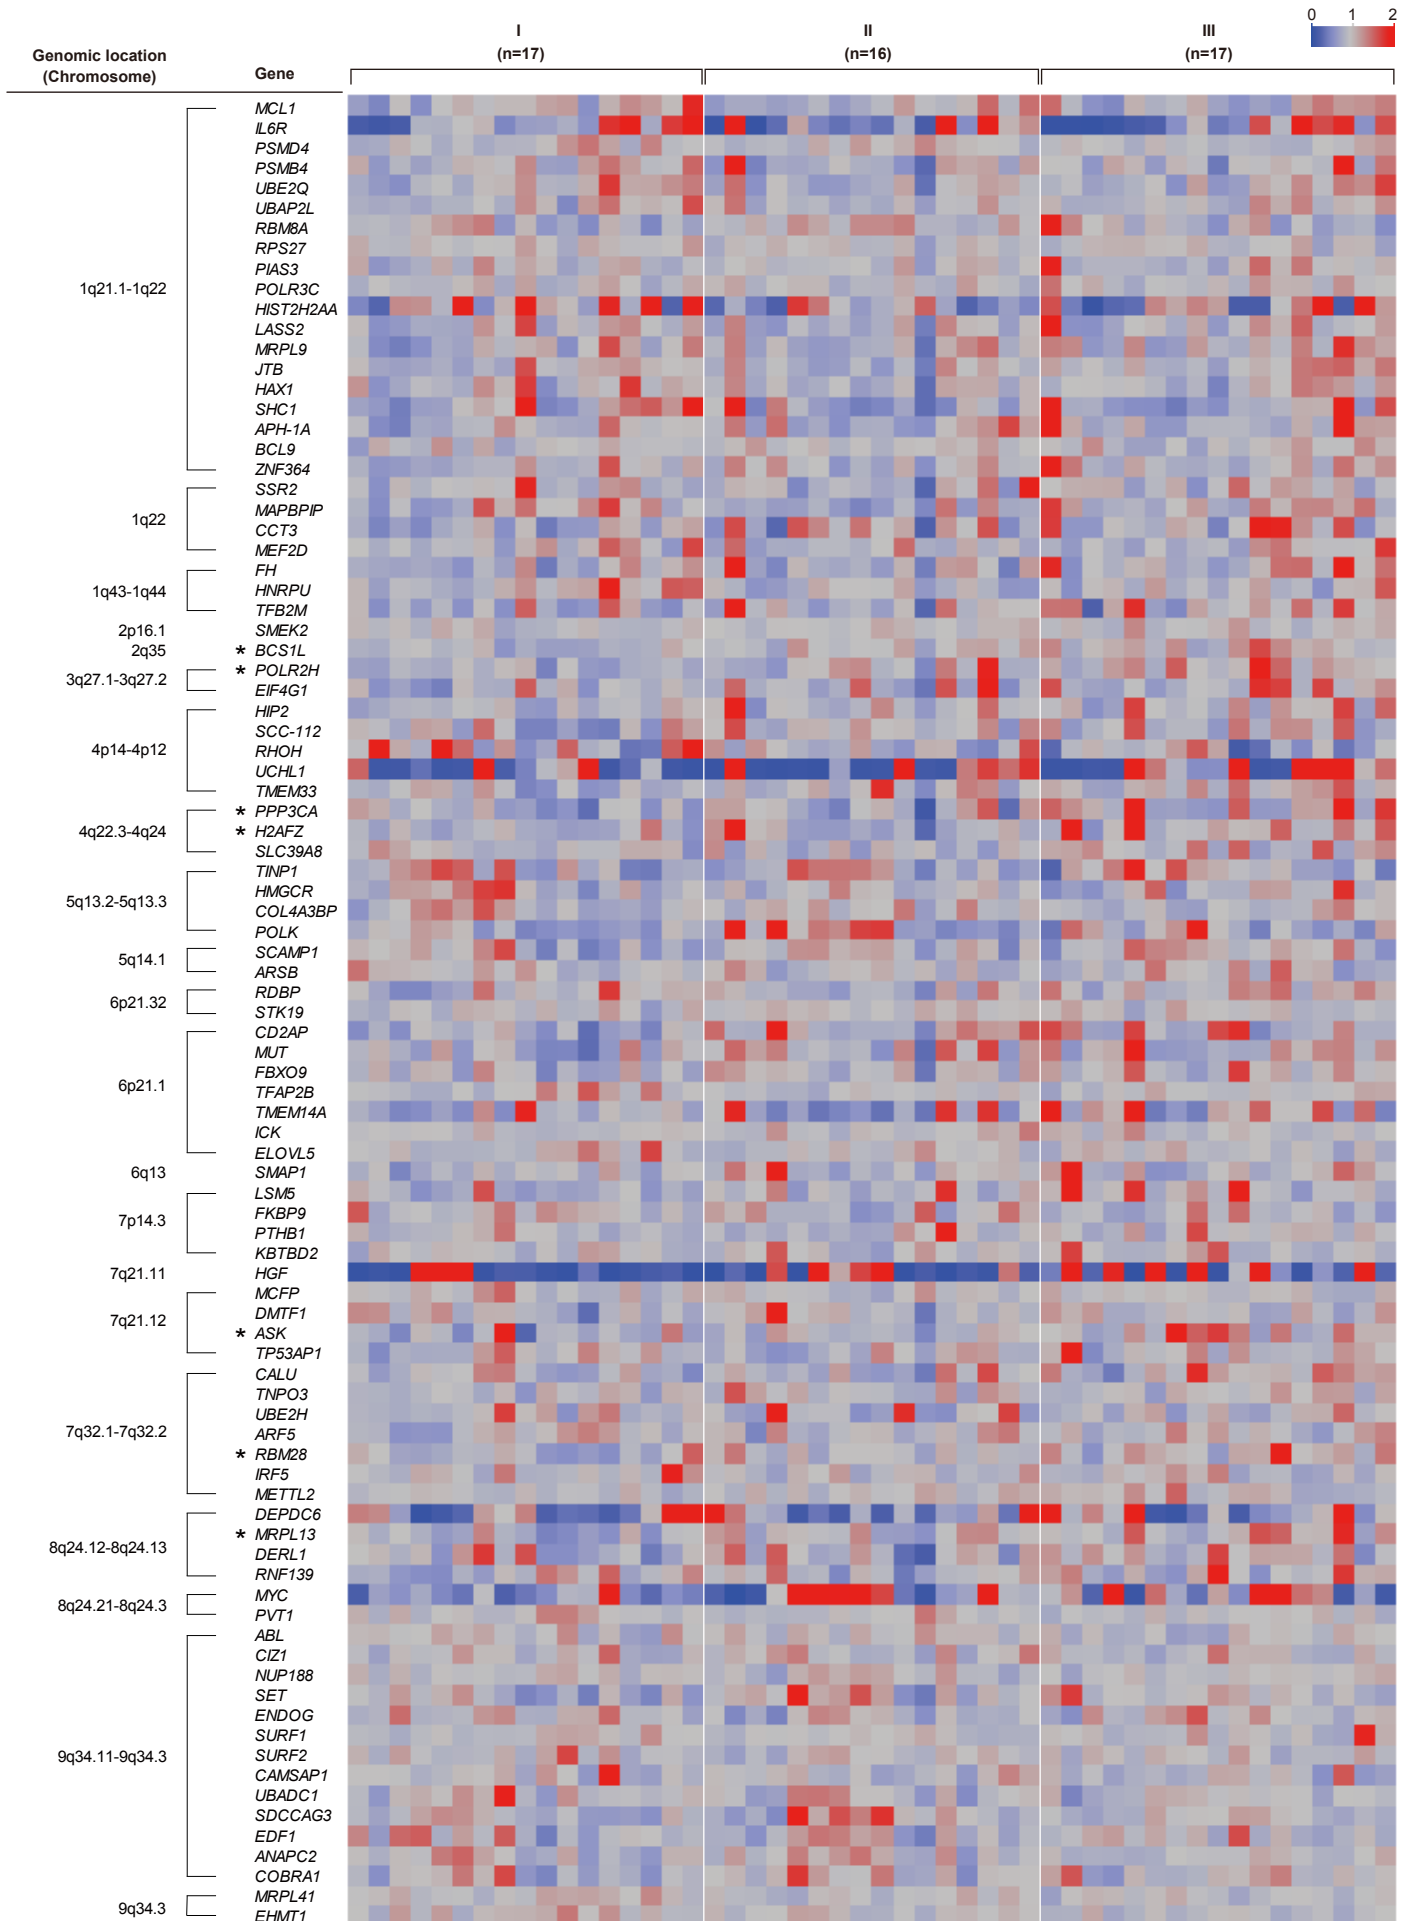

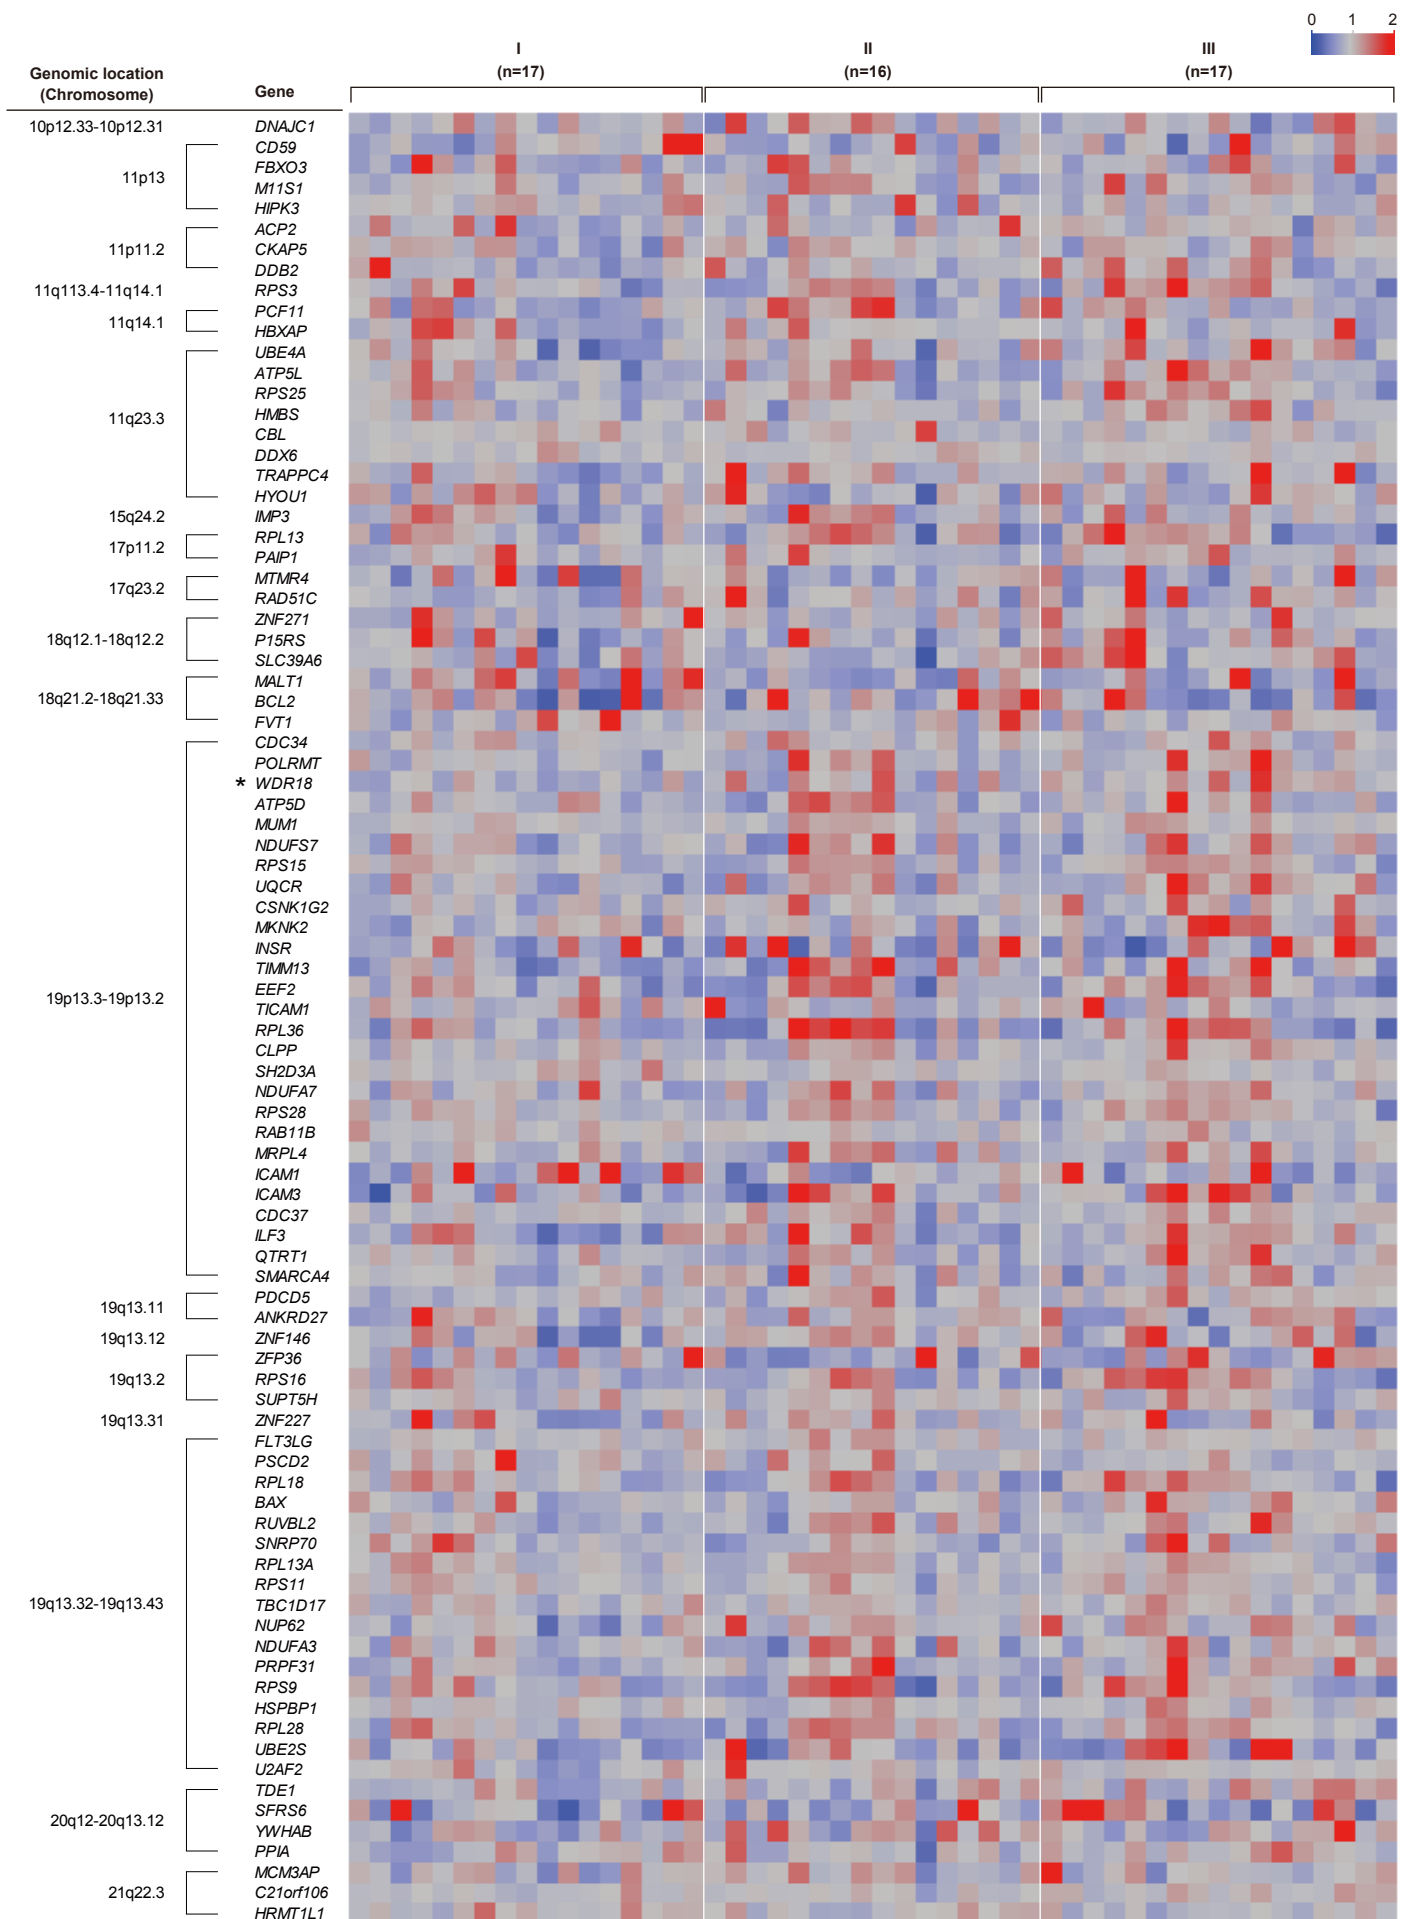

**Supplementary Figure 1. Expression analyses of the mRNA of candidate oncogenes in MM patients.** mRNA expression data on 179 candidate oncogenes in MM patient samples obtained were analyzed using GEO (20). Each patient's mRNA amount normalized was displayed by heat maps. Differences between stage I and III patients were analyzed using Tukey-Kramer HSD (honestly significant difference) test. \*, significant.

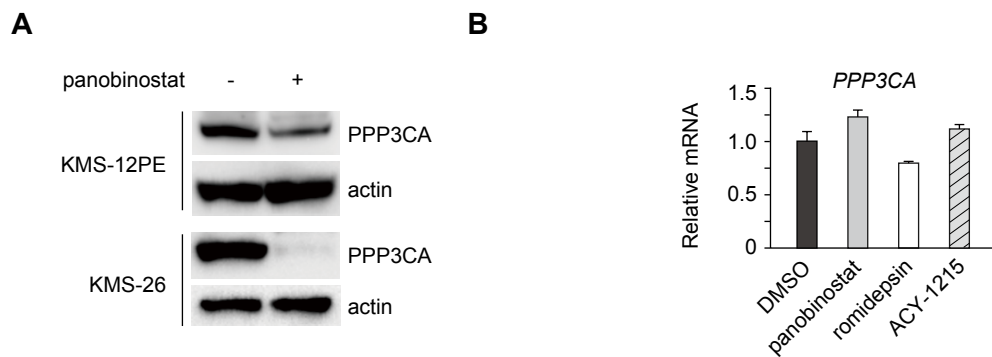

**Supplementary Figure 2. PPP3CA is suppressed by HDAC inhibitors in MM cells.** (A) Protein expression of PPP3CA in KMS-12PE and KMS-26 treated with 20 nM panobinostat for 48 h. Two biologically independent experiments were performed. (B) Relative mRNA expression of *PPP3CA* in U266 treated with 20 nM panobinostat, 2 nM romidepsin, or 10 mM ACY-1215 for 24 h (n=3). Two biologically independent experiments were performed.

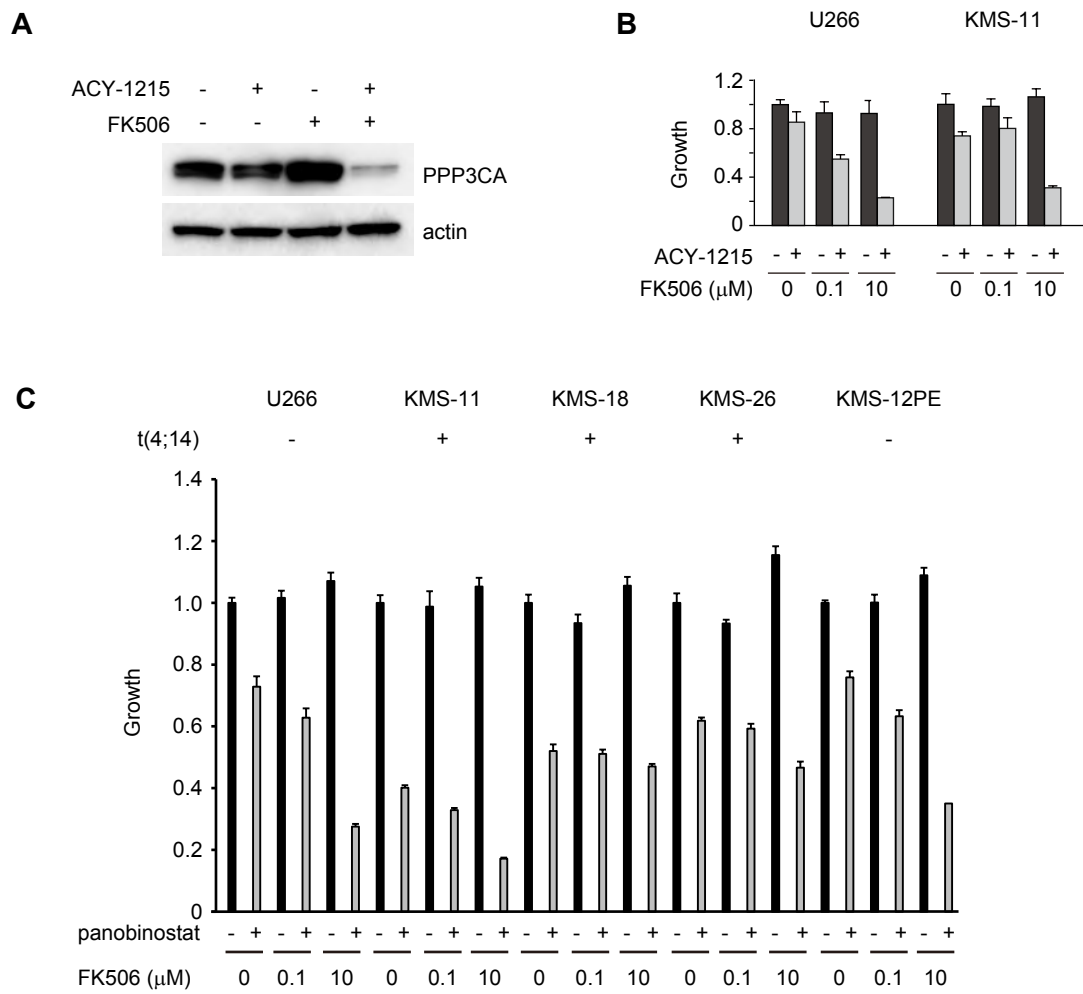

**Supplementary Figure 3. Analyses of MM cells treated with HDAC inhibitors and FK506.** (A) PPP3CA protein expression in U266 treated with 0.75  $\mu$ M ACY-1215, 10  $\mu$ M FK506, or both panobinostat and FK506 as indicated for 48 h. Two biologically independent experiments were performed. (B) MTT assays in U266 treated with 0.75  $\mu$ M ACY-1215, FK506 or both ACY-1215 and FK506 as indicated for 48 h (n=5). Two biologically independent experiments were performed. (C) MTT assays in U266, KMS-11, KMS-18, KMS-26 and KMS-12PE treated with 15 nM panobinostat, FK506, or both panobinostat and FK506 as indicated for 48 h (n=5). Two biologically independent experiments were performed. The presence or absence of t(4;14) in each cell lines is described.

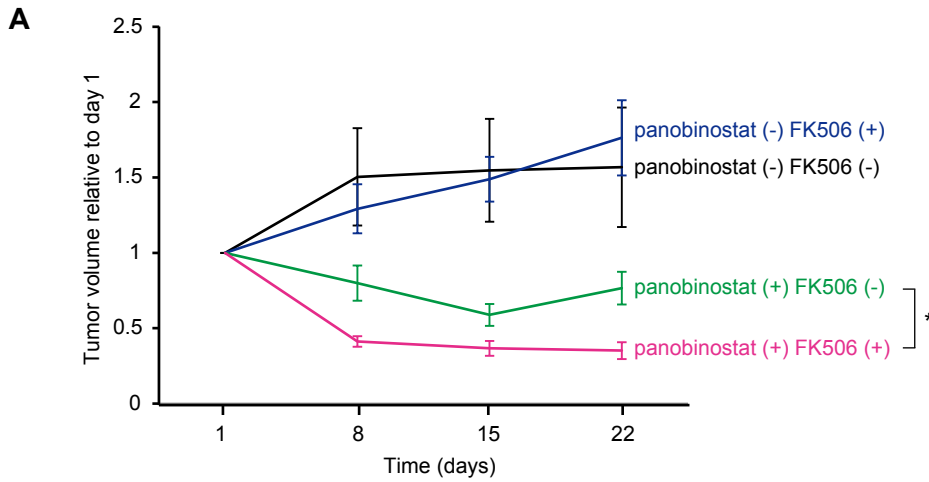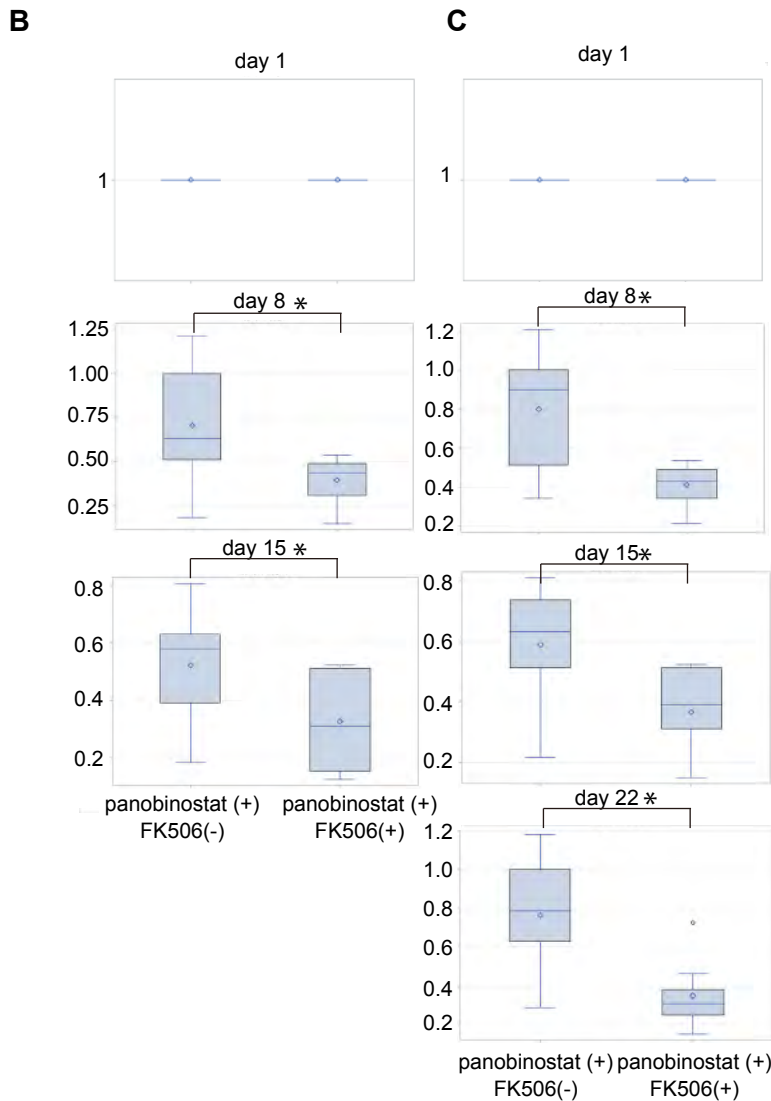

**Supplementary Figure 4. Time-dependent variation of tumor volume in xenograft mouse model treated for 22 days and statistical analyses of time-dependent variation of tumor volume in vivo study.** (A) NOD/SCID mice bearing U266 cells were treated with vehicle (n=4), panobinostat (n=5), FK506 (n=7), or both panobinostat and FK506 (n=9). Treatment was continued for 22 days. Average of the ratio of the tumor volume on days 8, 15, and 22 to that on day 1 is displayed for each condition. Error bars represent the standard errors. Difference between panobinostat (+) FK506 (-) and panobinostat (+) FK506 (+) on day 22 was analyzed using Scheffe test. \*, significant. (B, C) Time-dependent variation of tumor volume in xenograft mouse model was analyzed by SAS ver. 9.4 using GLM procedure. The distribution of tumor volume on designated days is displayed by box plot. Diamonds correspond to mean. The difference between two groups on designated days were estimated by Scheffe test analyses. \*, significant. (B) Panobinostat (+) FK506(-) and panobinostat (+) FK506(+), treatment for 15 days. (C) Panobinostat (+) FK506(-) and panobinostat (+) FK506(+), treatment for 22 days. The ratio of mean volume of panobinostat (+) FK506 (+)-treated mice to that of panobinostat (+) FK506 (-)-treated mice on day 22 (0.459) was less than that on day 15 (0.623).

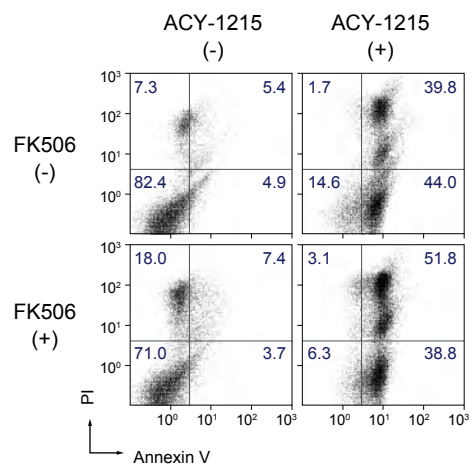

**Supplementary Figure 5. Analyses of MM cells treated with ACY-1215 and FK506.** (A) KMS-11 was treated with 0.5  $\mu$ M ACY-1215, 10  $\mu$ M FK506, or both ACY-1215 and FK506 as indicated for 36 h. Induced apoptosis was evaluated by flow cytometry. Four biologically independent experiments were performed.



**A**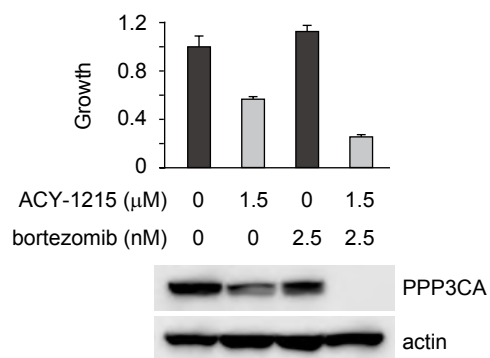**B**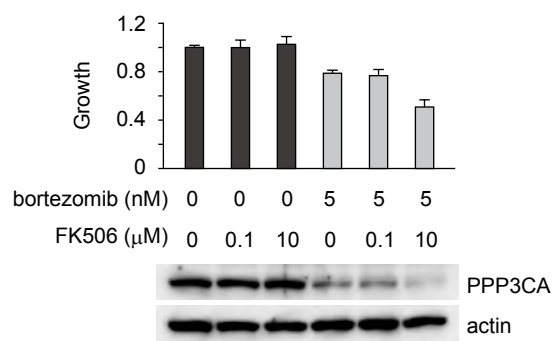

**Supplementary Figure 6. Synergistic inhibition of MM cell growth and PPP3CA expression by ACY-1215 and bortezomib or bortezomib and FK506.** (A) Cell growth (n=5) and protein expression in U266 treated with ACY-1215, bortezomib, or both ACY-1215 and bortezomib for 48 h. Two biologically independent experiments were performed. (B) Cell growth (n=5) and PPP3CA expression in U266 treated with bortezomib, FK506, or both bortezomib and FK506 as indicated for 72 h. Two biologically independent experiments were performed.

panobinostat,  
bortezomib

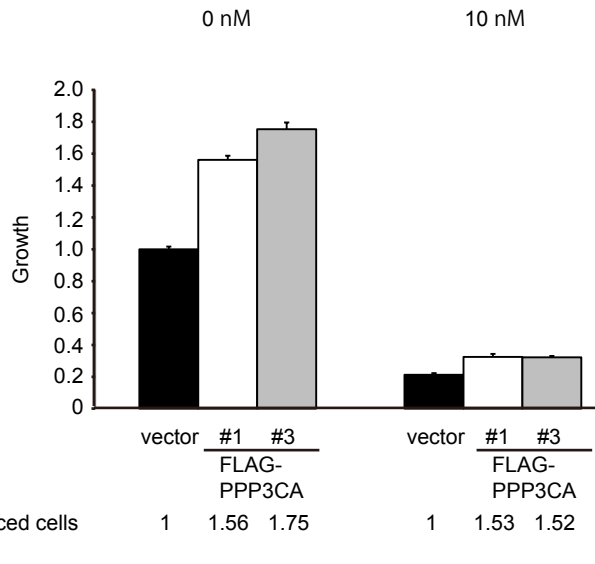

**Supplementary Figure 7. Ectopic overexpression of PPP3CA blocks the combination strategy with panobinostat and bortezomib.** Cell growth of KMS-11 lentivirally transduced with control vector or FLAG-PPP3CA (clone #1, #3) treated with vehicle or 10 nM of panobinostat and bortezomib for 72 h is displayed (n=5). The growth ratio of FLAG-PPP3CA-transduced cells to that of control cells is displayed. Two biologically independent experiments were performed.
